# Supplementary material
Source: PubMed Central journal article supplement (PMC5972063)
Supplement: NIHMS961539-supplement-supplement_1.pdf [file NIHMS961539-supplement-supplement_1.pdf]

**eTable 1**

Descriptive characteristics of strong heart study participants by visit

|                                                                            | Visit 1 |         | Visit 2 |         | Visit 3 |         | P-Value |
|----------------------------------------------------------------------------|---------|---------|---------|---------|---------|---------|---------|
| N (%)                                                                      | 3047    | 39.85   | 2430    | 31.78   | 2169    | 28.37   |         |
| Systolic blood pressure (adjusted)—mm Hg, mean (SD) <sup>a</sup>           | 128.9   | 20.7    | 131.9   | 21.9    | 135.0   | 20.8    | <0.001  |
| Diastolic blood pressure (adjusted)—mm Hg, mean (SD) <sup>a</sup>          | 77.6    | 10.8    | 76.1    | 10.9    | 76.2    | 10.5    | <0.001  |
| Pulse pressure (adjusted)—mm Hg, mean (SD) <sup>a</sup>                    | 51.3    | 16.4    | 55.8    | 17.7    | 58.8    | 17.4    | <0.001  |
| Age—y, mean (SD)                                                           | 56.4    | 8.1     | 60.2    | 8.0     | 63.7    | 7.9     | <0.001  |
| BMI—kg/m <sup>2</sup> , mean (SD) <sup>a</sup>                             | 30.5    | 6.0     | 30.9    | 6.3     | 30.8    | 6.2     | 0.001   |
| Urinary cadmium—μg/g, mean (SD) <sup>b</sup>                               | 1.5     | 2.2     | –       | –       | –       | –       |         |
| Log creatinine-adjusted urinary cadmium level—μg/g, mean (SD) <sup>b</sup> | 0       | 0.7     | –       | –       | –       | –       |         |
| Duration of education—y, mean (SD) <sup>a</sup>                            | 11.5    | 3.0     | 11.6    | 3.0     | 11.7    | 2.9     | 0.119   |
| eGFR—mL/min/1.73 m <sup>2</sup> , mean (SD) <sup>a</sup>                   | 73.4    | 18.4    | 71.9    | 22.1    | 72.4    | 22.5    | 0.019   |
| Triglycerides—mg/dL, mean (SD) <sup>a</sup>                                | 149.3   | (149.2) | 159.0   | (114.0) | 159.3   | (119.5) | 0.003   |
| Total cholesterol—mg/dL, mean (SD) <sup>a</sup>                            | 195.5   | 39.5    | 193.9   | 39.1    | 192.2   | 39.6    | 0.006   |
| High-density lipoprotein cholesterol—mg/dL, mean (SD) <sup>a</sup>         | 46.2    | 13.9    | 41.5    | 13.8    | 42.3    | 13.6    | <0.001  |
| Leisure activity per wk—METs, mean (SD) <sup>a</sup>                       | 16.2    | (31.2)  | 16.2    | (29.9)  | 16.6    | (31.9)  | 0.916   |
| Smoking status—n (%) <sup>a</sup>                                          |         |         |         |         |         |         |         |
| Nonsmoker                                                                  | 885     | 29.06   | 535     | 22.71   | 433     | 20.77   | <0.001  |
| Smoker                                                                     | 1139    | 37.41   | 800     | 33.96   | 625     | 29.98   |         |
| Ex-smoker                                                                  | 1021    | 33.53   | 1021    | 43.34   | 1027    | 49.26   |         |
| Diabetes—n (%)                                                             | 1289    | 42.30   | 1286    | 52.92   | 1217    | 56.11   | <0.001  |
| Hypertension—n (%)                                                         | 1146    | 37.61   | 1081    | 44.63   | 1146    | 53.30   | <0.001  |
| Alcohol consumption—n (%) <sup>a</sup>                                     |         |         |         |         |         |         |         |
| Ever drank                                                                 | 1307    | 43.02   | 117     | 8.48    | 1226    | 58.97   | <0.001  |
| Never drank                                                                | 452     | 14.88   | 466     | 33.77   | 397     | 19.10   |         |
| Current drinker                                                            | 1279    | 42.10   | 797     | 57.75   | 456     | 21.93   |         |
| Center—n (%)                                                               |         |         |         |         |         |         |         |
| Arizona                                                                    | 417     | 13.69   | 331     | 13.62   | 289     | 13.32   | 0.635   |
| Oklahoma                                                                   | 1322    | 43.39   | 1085    | 44.65   | 926     | 42.69   |         |
| North and South Dakota                                                     | 1308    | 42.93   | 1014    | 41.73   | 954     | 43.98   |         |
| Male—n (%)                                                                 | 1278    | 41.94   | 957     | 39.38   | 845     | 38.96   | 0.053   |
| Died by study end                                                          | 1266    | 41.55   | 878     | 36.13   | 624     | 28.77   | <0.001  |

BMI, body mass index; eGFR, estimated glomerular filtration rate; METs, metabolic equivalent of task.

Analysis of variance and chi-squared tests were used in that table for continuous and categorical variables, respectively.

<sup>a</sup> Missing data (visit 1): systolic blood pressure (adjusted)—13 (0.4%), diastolic blood pressure (adjusted)—15 (0.5%), pulse pressure (adjusted)—15 (0.5%), BMI—8 (0.3%), duration of education—3 (0.1%), eGFR—70 (2.3%), smoking status—2 (0.1%), triglycerides—22 (0.7%), total cholesterol—22 (0.7%), high-density lipoprotein cholesterol—23 (0.8%), alcohol consumption—9 (0.3%), leisure activity—86 (2.8%); Missing data (visit 2): systolic blood pressure (adjusted)—14 (0.6%), diastolic blood pressure (adjusted)—15 (0.6%), pulse pressure (adjusted)—15 (0.5%), BMI—15 (0.6%), duration of education—2 (0.1%), eGFR—73 (3.0%), smoking status—74 (3.0%), triglycerides—48 (2.0%), total cholesterol—50 (2.1%), high-density lipoprotein cholesterol—57 (2.3%), alcohol consumption—50 (2.1%), physical activity—65 (2.7%); Missing data (visit 3): systolic blood pressure (adjusted)—57 (2.6%), diastolic blood pressure (adjusted)—55 (2.5%), pulse pressure (adjusted)—57 (2.6%), BMI—81 (3.7%), duration of education—1 (0.0%), eGFR—78 (3.6%), smoking status—84 (3.9%), triglycerides—81 (3.7%), total cholesterol—81 (3.7%), high-density lipoprotein cholesterol—81 (3.7%), alcohol consumption—90 (4.1%), physical activity—56 (2.6%).

<sup>b</sup> Cadmium was measured once at the start of the study.

**eTable 2**

Hazard ratios and 95% confidence intervals for the association between creatinine-adjusted urinary cadmium level and risk of hypertension, only including individuals with smoking data, n = 2864

|                 | Unadjusted       | Adjusted for Smoking | Model 2          | Model 2 + Smoking |
|-----------------|------------------|----------------------|------------------|-------------------|
| Continuous      | 1.03 (0.95–1.10) | 1.02 (0.94–1.10)     | 1.10 (1.01–1.20) | 1.09 (1.00–1.19)  |
| First quintile  | 1.00 (Ref)       | Ref                  | 1.00 (Ref)       | Ref               |
| Second quintile | 0.99 (0.85–1.15) | 0.98 (0.84–1.14)     | 1.04 (0.89–1.22) | 1.03 (0.88–1.21)  |
| Third quintile  | 0.94 (0.81–1.10) | 0.93 (0.80–1.09)     | 1.04 (0.89–1.23) | 1.03 (0.87–1.22)  |
| Fourth quintile | 1.03 (0.88–1.21) | 1.01 (0.86–1.19)     | 1.15 (0.97–1.36) | 1.13 (0.95–1.34)  |
| Fifth quintile  | 1.02 (0.87–1.20) | 1.00 (0.85–1.18)     | 1.17 (0.97–1.40) | 1.14 (0.95–1.37)  |

Model 2: Sex, age, center, estimated glomerular filtration rate, body mass index, education level, alcohol consumption, diabetes status, triglycerides, total cholesterol, high-density lipoprotein cholesterol level, physical activity level.

**eTable 3**

Estimated systolic blood pressure, diastolic blood pressure, and pulse pressure in upper and lower quintiles of creatinine-adjusted urinary cadmium by sex, fully adjusted, n = 2853

|                                  | Female                 |                        | Male                   |                        |
|----------------------------------|------------------------|------------------------|------------------------|------------------------|
|                                  | Q1                     | Q5                     | Q1                     | Q5                     |
| Systolic blood pressure (mm Hg)  |                        |                        |                        |                        |
| 0 y                              | 127.70 (124.57–130.82) | 127.65 (125.78–129.52) | 132.15 (130.10–134.21) | 131.86 (127.62–136.11) |
| 5 y                              | 130.22 (127.68–132.77) | 131.29 (129.77–132.81) | 132.52 (130.86–134.18) | 131.47 (127.90–135.05) |
| 10 y                             | 132.75 (129.22–136.28) | 134.92 (132.76–137.08) | 132.88 (130.51–133.25) | 131.08 (125.81–136.35) |
| Diastolic blood pressure (mm Hg) |                        |                        |                        |                        |
| 0 y                              | 74.86 (73.20–76.52)    | 73.47 (72.48–74.47)    | 80.85 (79.75–81.94)    | 80.00 (77.74–82.25)    |
| 5 y                              | 74.93 (73.66–76.19)    | 74.51 (73.75–75.27)    | 80.02 (79.20–80.84)    | 80.08 (78.30–81.86)    |
| 10 y                             | 74.99 (73.24–76.74)    | 75.55 (74.47–76.62)    | 79.19 (78.20–80.37)    | 80.15 (77.52–82.79)    |
| Pulse pressure (mm Hg)           |                        |                        |                        |                        |
| 0 y                              | 52.91 (50.53–55.29)    | 54.15 (52.72–55.57)    | 51.30 (49.73–52.86)    | 51.84 (48.60–55.07)    |
| 5 y                              | 55.32 (53.40–57.24)    | 56.75 (55.60–57.90)    | 52.48 (51.23–53.73)    | 51.30 (48.60–54.01)    |
| 10 y                             | 57.72 (54.97–60.48)    | 59.35 (57.66–61.03)    | 53.66 (51.81–55.71)    | 50.76 (46.65–54.88)    |

Systolic blood pressure: *P* for interaction, .728; diastolic blood pressure: *P* for interaction, .876; pulse pressure: *P* for interaction, .758.

Adjusted for age, age<sup>2</sup>, center, estimated glomerular filtration rate, body mass index, smoking status, education duration, history of diabetes, triglyceride level, total cholesterol level, high-density lipoprotein cholesterol level, alcohol consumption, and physical activity.

**eTable 4**

Estimated systolic blood pressure, diastolic blood pressure, and pulse pressure in upper and lower quintiles of creatinine-adjusted urinary cadmium by recruiting center, fully adjusted, n = 2853

|                                         | Arizona                |                        | Oklahoma               |                        | North Dakota/South Dakota |                        |
|-----------------------------------------|------------------------|------------------------|------------------------|------------------------|---------------------------|------------------------|
|                                         | Q1                     | Q5                     | Q1                     | Q5                     | Q1                        | Q5                     |
| <b>Systolic blood pressure (mm Hg)</b>  |                        |                        |                        |                        |                           |                        |
| 0 y                                     | 132.48 (128.46–136.50) | 136.25 (131.05–141.44) | 134.59 (132.25–136.94) | 130.86 (127.70–134.03) | 124.95 (121.69–128.20)    | 124.55 (122.34–126.76) |
| 5 y                                     | 132.33 (128.92–135.75) | 136.37 (132.01–140.72) | 134.89 (133.01–136.78) | 134.66 (132.04–137.28) | 127.81 (125.14–130.48)    | 127.80 (125.98–129.61) |
| 10 y                                    | 132.19 (127.08–137.30) | 136.49 (130.26–142.72) | 135.20 (132.56–137.83) | 138.46 (134.77–142.14) | 130.67 (127.04–134.30)    | 131.05 (128.49–133.60) |
| <b>Diastolic blood pressure (mm Hg)</b> |                        |                        |                        |                        |                           |                        |
| 0 y                                     | 77.73 (75.60–79.85)    | 79.44 (76.70–82.18)    | 80.47 (79.24–81.71)    | 77.30 (75.63–78.97)    | 74.02 (72.30–75.74)       | 73.70 (72.53–74.87)    |
| 5 y                                     | 77.44 (75.74–79.14)    | 77.65 (75.48–79.82)    | 78.35 (77.41–79.29)    | 77.54 (76.23–78.85)    | 76.27 (74.94–77.60)       | 75.39 (74.49–76.30)    |
| 10 y                                    | 77.16 (74.62–79.90)    | 75.86 (72.77–78.94)    | 76.23 (74.93–77.53)    | 77.78 (75.95–79.60)    | 78.52 (76.73–80.30)       | 77.09 (75.82–78.35)    |
| <b>Pulse pressure (mm Hg)</b>           |                        |                        |                        |                        |                           |                        |
| 0 y                                     | 54.71 (51.65–57.77)    | 56.81 (52.86–60.76)    | 54.12 (52.33–55.90)    | 53.59 (51.18–56.00)    | 50.92 (48.44–53.39)       | 50.84 (49.15–52.52)    |
| 5 y                                     | 54.88 (52.30–57.47)    | 58.74 (55.45–62.04)    | 56.49 (55.07–57.91)    | 57.09 (55.10–59.07)    | 51.52 (49.51–53.54)       | 52.40 (51.03–53.77)    |
| 10 y                                    | 55.06 (51.07–59.06)    | 60.68 (55.82–65.53)    | 58.86 (56.81–60.91)    | 60.59 (57.72–63.45)    | 52.13 (49.31–54.96)       | 53.96 (51.97–55.95)    |

Systolic blood pressure: *P* for interaction (across all quintiles), .054; diastolic blood pressure: *P* for interaction, .017; pulse pressure: *P* for interaction, .335.

Adjusted for sex, age, age<sup>2</sup>, estimated glomerular filtration rate, body mass index, smoking status, education duration, history of diabetes, triglyceride level, total cholesterol level, high-density lipoprotein cholesterol level, alcohol consumption, and physical activity.

**eTable 5**

Estimated systolic blood pressure, diastolic blood pressure, and pulse pressure in upper and lower quintiles of creatinine-adjusted urinary cadmium by smoking status, fully adjusted, n = 2853

|                                         | Never Smoker           |                        | Ever Smoker            |                        | Current Smoker         |                        |
|-----------------------------------------|------------------------|------------------------|------------------------|------------------------|------------------------|------------------------|
|                                         | Q1                     | Q5                     | Q1                     | Q5                     | Q1                     | Q5                     |
| <b>Systolic blood pressure (mm Hg)</b>  |                        |                        |                        |                        |                        |                        |
| 0 y                                     | 133.66 (131.14–136.17) | 130.43 (127.20–133.65) | 132.15 (129.44–134.86) | 129.03 (125.61–132.45) | 124.05 (120.29–127.81) | 125.12 (122.84–127.39) |
| 5 y                                     | 133.70 (131.88–135.52) | 132.75 (130.55–134.94) | 133.07 (130.76–135.39) | 135.94 (132.93–138.95) | 127.79 (124.84–130.74) | 127.48 (125.61–129.36) |
| 10 y                                    | 133.75 (131.25–136.25) | 135.06 (132.12–138.00) | 133.99 (130.43–137.55) | 142.85 (138.11–147.60) | 131.53 (126.73–136.32) | 129.85 (126.92–132.78) |
| <b>Diastolic blood pressure (mm Hg)</b> |                        |                        |                        |                        |                        |                        |
| 0 y                                     | 78.49 (77.14–79.83)    | 76.55 (74.82–78.28)    | 79.02 (77.56–80.47)    | 77.70 (75.86–79.54)    | 76.10 (74.07–78.12)    | 73.28 (72.06–74.50)    |
| 5 y                                     | 77.86 (76.94–78.78)    | 77.18 (76.05–78.30)    | 78.27 (77.11–79.44)    | 78.65 (77.13–80.17)    | 76.44 (74.92–79.23)    | 74.46 (73.52–75.41)    |
| 10 y                                    | 77.23 (75.98–78.49)    | 77.81 (76.31–79.30)    | 77.53 (75.75–79.31)    | 79.60 (77.22–81.98)    | 76.78 (74.32–79.23)    | 75.65 (74.16–77.13)    |
| <b>Pulse pressure (mm Hg)</b>           |                        |                        |                        |                        |                        |                        |
| 0 y                                     | 55.15 (53.22–57.08)    | 53.83 (51.35–56.30)    | 53.18 (51.11–55.26)    | 51.32 (48.69–53.95)    | 48.09 (45.19–50.99)    | 51.77 (50.03–53.51)    |
| 5 y                                     | 55.82 (54.44–57.21)    | 55.49 (53.81–57.16)    | 54.86 (53.09–56.62)    | 57.32 (55.02–59.62)    | 51.37 (49.10–53.63)    | 52.94 (51.51–54.37)    |
| 10 y                                    | 56.50 (54.54–58.46)    | 57.15 (54.84–59.45)    | 56.53 (53.74–59.32)    | 63.32 (59.60–67.05)    | 54.65 (50.87–58.42)    | 54.11 (51.82–56.41)    |

Systolic blood pressure: *P* for interaction (across all quintiles), .043; diastolic blood pressure: *P* for interaction, .996; pulse pressure: *P* for interaction, .014.

Adjusted for sex, age, age<sup>2</sup>, center, estimated glomerular filtration rate, body mass index, education duration, history of diabetes, triglyceride level, total cholesterol level, high-density lipoprotein cholesterol level, alcohol consumption and physical activity.

**eTable 6**

Estimated systolic blood pressure, diastolic blood pressure, and pulse pressure, not adjusted for antihypertensive medication, in upper and lower quintiles of creatinine-adjusted urinary cadmium by smoking status, fully adjusted, n = 2853

|                                  | Q1                     | Q2                     | Q3                     | Q4                     | Q5                     |
|----------------------------------|------------------------|------------------------|------------------------|------------------------|------------------------|
| Systolic blood pressure (mm Hg)  |                        |                        |                        |                        |                        |
| 0 y                              | 128.55 (126.53–130.57) | 129.64 (127.75–131.54) | 127.76 (125.85–129.67) | 126.92 (125.06–128.78) | 128.83 (126.88–130.78) |
| 5 y                              | 129.72 (128.11–131.33) | 131.31 (129.84–132.79) | 129.68 (128.19–131.18) | 129.26 (127.79–130.74) | 131.69 (130.11–133.27) |
| 10 y                             | 130.89 (128.69–133.10) | 132.99 (130.89–135.09) | 131.60 (129.44–133.76) | 131.61 (129.49–133.73) | 134.56 (132.34–136.77) |
| Diastolic blood pressure (mm Hg) |                        |                        |                        |                        |                        |
| 0 y                              | 76.95 (75.86–78.04)    | 77.65 (76.61–78.68)    | 75.51 (74.48–76.55)    | 76.58 (75.57–77.59)    | 76.13 (75.07–77.19)    |
| 5 y                              | 76.67 (75.85–77.50)    | 76.99 (76.24–77.74)    | 76.09 (75.33–76.86)    | 76.73 (75.97–77.49)    | 77.03 (76.22–77.84)    |
| 10 y                             | 76.40 (75.26–77.54)    | 76.34 (75.25–77.42)    | 76.68 (75.56–77.80)    | 76.88 (75.78–77.98)    | 77.94 (76.79–79.09)    |
| Pulse pressure (mm Hg)           |                        |                        |                        |                        |                        |
| 0 y                              | 51.60 (50.09–53.12)    | 52.01 (50.59–53.44)    | 52.22 (50.79–53.65)    | 50.41 (49.02–51.81)    | 52.67 (51.21–54.13)    |
| 5 y                              | 53.04 (51.84–54.25)    | 54.33 (53.22–55.43)    | 53.54 (52.42–54.66)    | 52.59 (51.48–53.70)    | 54.59 (53.41–55.77)    |
| 10 y                             | 54.49 (52.78–56.19)    | 56.64 (55.01–58.27)    | 54.86 (53.18–56.54)    | 54.77 (53.12–56.41)    | 56.51 (54.80–58.23)    |

Systolic blood pressure: *P* for interaction (across all quintiles), .077; diastolic blood pressure: *P* for interaction, .002; pulse pressure: *P* for interaction, .915.

Adjusted for sex, age, age<sup>2</sup>, center, estimated glomerular filtration rate, body mass index, smoking status, education duration, history of diabetes, triglyceride level, total cholesterol level, high-density lipoprotein cholesterol level, alcohol consumption, and physical activity.

**eTable 7**

Estimated systolic blood pressure, diastolic blood pressure, and pulse pressure in upper and lower quintiles of creatinine-adjusted urinary cadmium by smoking status, excluding individuals with a history of heart conditions, fully adjusted, n = 2784

|                                  | Q1                     | Q2                     | Q3                     | Q4                     | Q5                     |
|----------------------------------|------------------------|------------------------|------------------------|------------------------|------------------------|
| Systolic blood pressure (mm Hg)  |                        |                        |                        |                        |                        |
| 0 y                              | 128.55 (126.53–130.57) | 129.64 (127.75–131.54) | 127.76 (125.85–129.67) | 126.92 (125.06–128.78) | 128.83 (126.88–130.78) |
| 5 y                              | 129.72 (128.11–131.33) | 131.31 (129.84–132.79) | 129.68 (128.19–131.18) | 129.26 (127.79–130.74) | 131.69 (130.11–133.27) |
| 10 y                             | 130.89 (128.69–133.10) | 132.99 (130.89–135.09) | 131.60 (129.44–133.76) | 131.61 (129.49–133.73) | 134.56 (132.34–136.77) |
| Diastolic blood pressure (mm Hg) |                        |                        |                        |                        |                        |
| 0 y                              | 76.95 (75.86–78.04)    | 77.65 (76.61–78.68)    | 75.51 (74.48–76.55)    | 76.58 (75.57–77.59)    | 76.13 (75.07–77.19)    |
| 5 y                              | 76.67 (75.85–77.50)    | 76.99 (76.24–77.74)    | 76.09 (75.33–76.86)    | 76.73 (75.97–77.49)    | 77.03 (76.22–77.84)    |
| 10 y                             | 76.40 (75.26–77.54)    | 76.34 (75.25–77.42)    | 76.68 (75.56–77.80)    | 76.88 (75.78–77.98)    | 77.94 (76.79–79.09)    |
| Pulse pressure (mm Hg)           |                        |                        |                        |                        |                        |
| 0 y                              | 51.60 (50.09–53.12)    | 52.01 (50.59–53.44)    | 52.22 (50.79–53.65)    | 50.41 (49.02–51.81)    | 52.67 (51.21–54.13)    |
| 5 y                              | 53.04 (51.84–54.25)    | 54.33 (53.22–55.43)    | 53.54 (52.42–54.66)    | 52.59 (51.48–53.70)    | 54.59 (53.41–55.77)    |
| 10 y                             | 54.49 (52.78–56.19)    | 56.64 (55.01–58.28)    | 54.86 (53.18–56.54)    | 54.77 (53.12–56.41)    | 56.51 (54.80–58.23)    |

Systolic blood pressure: *P* for interaction (across all quintiles), .422; diastolic blood pressure: *P* for interaction, .017; pulse pressure: *P* for interaction, .573.

Adjusted for sex, age, age<sup>2</sup>, center, estimated glomerular filtration rate, body mass index, smoking status, education duration, history of diabetes, triglyceride level, total cholesterol level, high-density lipoprotein cholesterol level, alcohol consumption, and physical activity.

**eTable 8**

Estimated systolic blood pressure, diastolic blood pressure, pulse pressure in upper and lower quintiles of creatinine-adjusted urinary cadmium by smoking status, excluding individuals with baseline hypertension, fully adjusted, n = 1790

|                                  | Q1                     | Q2                     | Q3                     | Q4                     | Q5                     |
|----------------------------------|------------------------|------------------------|------------------------|------------------------|------------------------|
| Systolic blood pressure (mm Hg)  |                        |                        |                        |                        |                        |
| 0 y                              | 116.84 (115.22–118.45) | 116.97 (115.52–118.42) | 115.87 (114.48–117.25) | 115.97 (114.60–117.34) | 116.93 (115.52–118.34) |
| 5 y                              | 121.94 (120.51–123.37) | 122.62 (121.35–123.89) | 122.84 (121.61–124.06) | 121.67 (120.42–122.92) | 124.13 (122.85–125.41) |
| 10 y                             | 127.04 (124.59–129.48) | 128.27 (120.02–130.52) | 129.81 (127.60–132.02) | 127.37 (125.11–129.62) | 131.33 (129.12–133.54) |
| Diastolic blood pressure (mm Hg) |                        |                        |                        |                        |                        |
| 0 y                              | 72.31 (71.27–73.35)    | 72.55 (71.61–73.49)    | 71.21 (70.32–72.11)    | 71.60 (70.71–72.49)    | 71.28 (70.37–72.19)    |
| 5 y                              | 73.46 (72.66–74.27)    | 73.60 (72.89–74.30)    | 73.50 (72.82–74.18)    | 73.49 (72.80–74.19)    | 73.83 (73.12–74.55)    |
| 10 y                             | 74.62 (73.36–75.88)    | 74.64 (73.49–75.79)    | 75.79 (74.65–76.92)    | 75.39 (74.23–76.55)    | 76.38 (75.24–77.52)    |
| Pulse pressure (mm Hg)           |                        |                        |                        |                        |                        |
| 0 y                              | 44.54 (43.22–45.86)    | 44.48 (43.29–45.66)    | 44.66 (43.53–45.79)    | 44.34 (43.22–45.46)    | 45.55 (44.40–46.71)    |
| 5 y                              | 48.57 (47.43–49.70)    | 49.06 (48.05–50.07)    | 49.33 (48.36–50.30)    | 48.19 (47.19–49.18)    | 50.20 (49.18–51.21)    |
| 10 y                             | 52.59 (50.69–54.50)    | 53.64 (51.89–55.72)    | 54.00 (52.28–55.72)    | 52.04 (50.28–53.79)    | 54.84 (53.11–56.56)    |

Systolic blood pressure: *P* for interaction (across all quintiles), .138; diastolic blood pressure: *P* for interaction, .015; pulse pressure: *P* for interaction, .730.

Adjusted for sex, age, age<sup>2</sup>, center, estimated glomerular filtration rate, body mass index, smoking status, education duration, history of diabetes, triglyceride level, total cholesterol level, high-density lipoprotein cholesterol level, alcohol consumption, and physical activity.

**eTable 9**

Estimated systolic blood pressure, diastolic blood pressure, and pulse pressure in upper and lower quintiles of creatinine-adjusted urinary cadmium by smoking status, adjusted for packs per year, fully adjusted, n = 1905

|                                  | Q1                     | Q2                     | Q3                     | Q4                     | Q5                     |
|----------------------------------|------------------------|------------------------|------------------------|------------------------|------------------------|
| Systolic blood pressure (mm Hg)  |                        |                        |                        |                        |                        |
| 0 y                              | 128.74 (126.35–131.13) | 128.03 (128.03–130.10) | 127.10 (125.04–130.10) | 126.88 (124.88–128.88) | 127.69 (125.64–129.74) |
| 5 y                              | 129.93 (127.96–131.90) | 130.35 (128.68–132.02) | 129.90 (128.68–132.02) | 129.03 (127.41–130.65) | 130.65 (128.94–132.36) |
| 10 y                             | 131.13 (128.39–133.87) | 132.67 (130.26–135.09) | 132.71 (130.26–135.09) | 131.18 (128.83–133.53) | 133.61 (131.17–136.06) |
| Diastolic blood pressure (mm Hg) |                        |                        |                        |                        |                        |
| 0 y                              | 77.12 (75.83–78.41)    | 77.30 (76.19–78.42)    | 75.78 (74.66–76.90)    | 76.07 (74.99–77.15)    | 75.04 (73.94–76.16)    |
| 5 y                              | 76.99 (76.01–77.97)    | 76.92 (76.09–77.75)    | 76.31 (75.49–77.13)    | 76.23 (75.43–77.04)    | 76.04 (75.18–76.89)    |
| 10 y                             | 76.85 (75.49–78.22)    | 76.54 (75.33–77.75)    | 76.85 (75.65–78.04)    | 76.40 (75.23–77.58)    | 77.04 (75.81–78.26)    |
| Pulse pressure (mm Hg)           |                        |                        |                        |                        |                        |
| 0 y                              | 51.64 (49.86–53.43)    | 50.78 (49.24–52.33)    | 51.32 (49.77–52.86)    | 50.84 (49.35–52.34)    | 52.59 (51.06–54.12)    |
| 5 y                              | 52.92 (51.47–54.38)    | 53.43 (52.20–54.67)    | 53.59 (52.38–54.81)    | 52.80 (51.60–54.00)    | 54.50 (53.23–55.77)    |
| 10 y                             | 54.20 (52.10–56.31)    | 56.09 (54.22–57.95)    | 55.87 (54.02–57.72)    | 54.76 (52.95–56.57)    | 56.41 (54.53–58.29)    |

Systolic blood pressure: *P* for interaction (across all quintiles), .511; diastolic blood pressure: *P* for interaction, .105; pulse pressure: *P* for interaction, .594.

Adjusted for sex, age, age<sup>2</sup>, center, estimated glomerular filtration rate, body mass index, smoking status, education duration, history of diabetes, triglyceride level, total cholesterol level, high-density lipoprotein cholesterol level, alcohol consumption, physical activity, and packs per year.

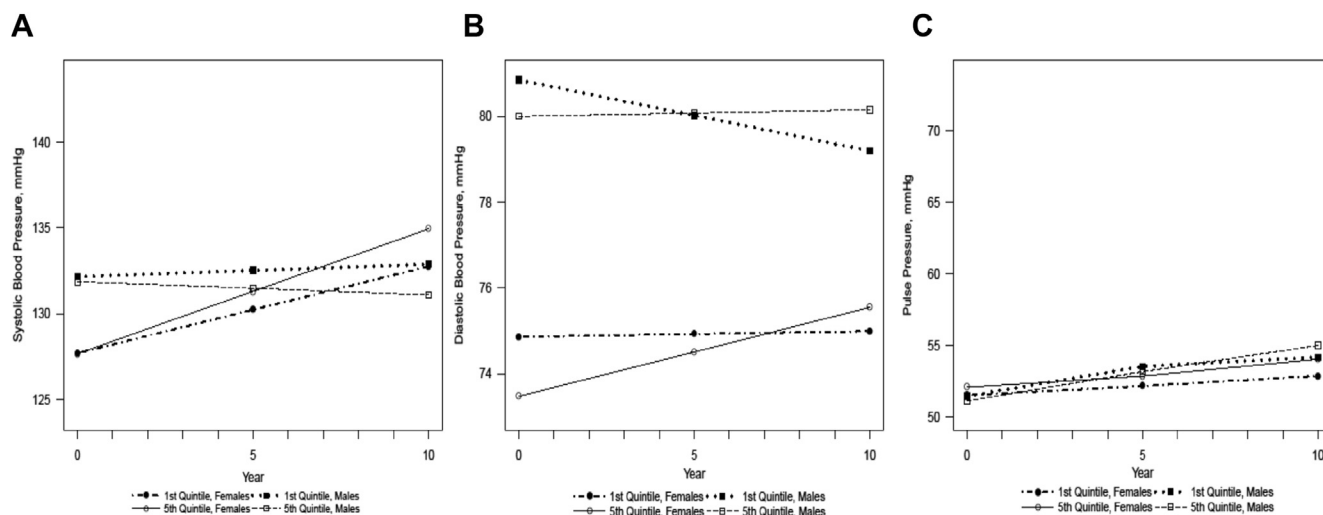

**Figure 1.** Estimated (A) systolic blood pressure, (B) diastolic blood pressure, (C) pulse pressure, in upper and lower quintiles of creatinine-adjusted urinary cadmium by sex, fully adjusted,  $n = 2853$ . (A)  $P$  for interaction (across all quintiles): .728; (B)  $P$  for interaction: .876; (C)  $P$  for interaction: .758. N: males—Q1 = 394, Q2 = 284, Q3 = 233, Q4 = 189, Q5 = 93; females—Q1 = 169, Q2 = 297, Q3 = 346, Q4 = 389, Q5 = 459. Adjusted for age, age<sup>2</sup>, center, estimated glomerular filtration rate, body mass index, smoking status, education duration, history of diabetes, triglyceride level, total cholesterol level, high-density lipoprotein cholesterol level, alcohol consumption, and physical activity.

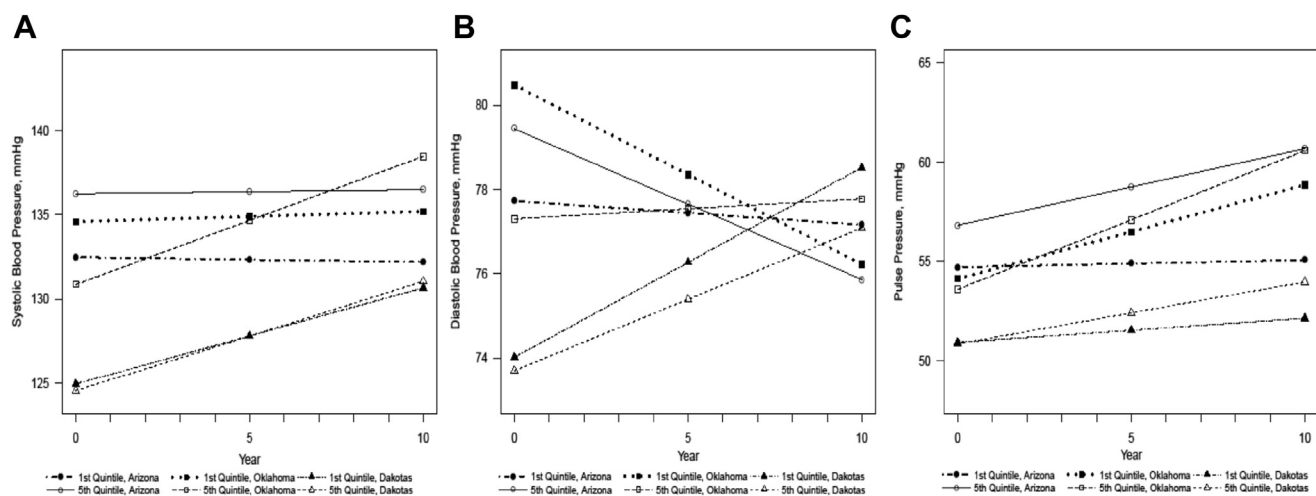

**Figure 2.** Estimated (A) systolic blood pressure, (B) diastolic blood pressure, (C) pulse pressure, in upper and lower quintiles of creatinine-adjusted urinary cadmium by recruiting center, fully adjusted,  $n = 2853$ . (A)  $P$  for interaction (across all quintiles): .054; (B)  $P$  for interaction: .017; (C)  $P$  for interaction: .335. N: Arizona—Q1 = 98, Q2 = 100, Q3 = 80, Q4 = 59, Q5 = 57; Oklahoma—Q1 = 303, Q2 = 294, Q3 = 239, Q4 = 259, Q5 = 157; South Dakota—Q1 = 162, Q2 = 187, Q3 = 260, Q4 = 260, Q5 = 338. Adjusted for sex, age, age<sup>2</sup>, estimated glomerular filtration rate, body mass index, smoking status, education duration, history of diabetes, triglyceride level, total cholesterol level, high-density lipoprotein cholesterol level, alcohol consumption, and physical activity.

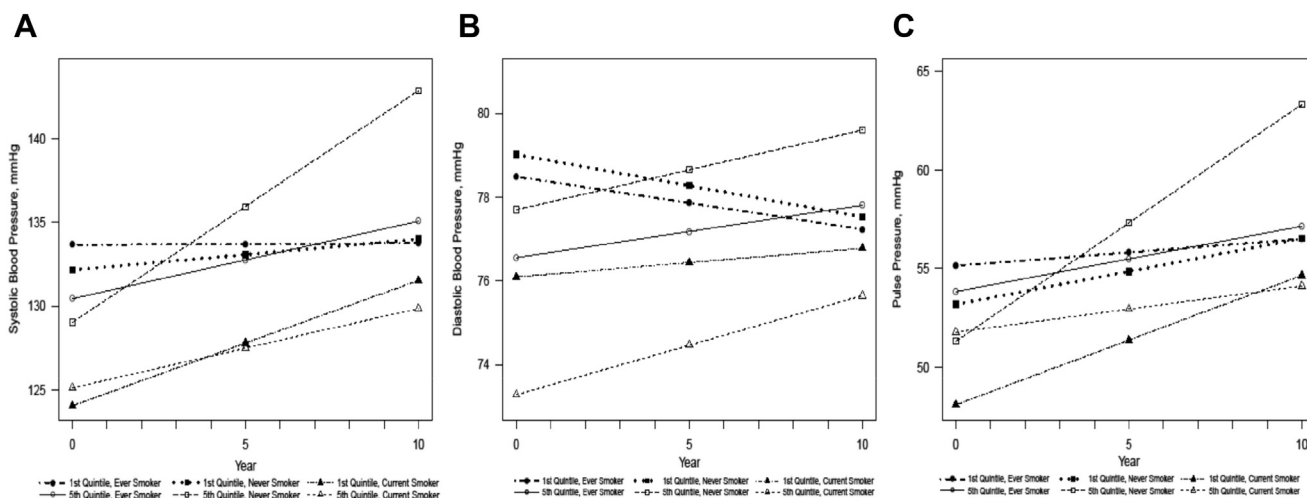

**eFigure 3.** Estimated (A) systolic blood pressure, (B) diastolic blood pressure, (C) pulse pressure, in upper and lower quintiles of creatinine-adjusted urinary cadmium by smoking status, fully adjusted,  $n = 2853$ . (A)  $P$  for interaction (across all quintiles): .043; (B)  $P$  for interaction: .996; (C)  $P$  for interaction: .014. N: ever—Q1 = 243, Q2 = 233, Q3 = 191, Q4 = 157, Q5 = 132; never—Q1 = 211, Q2 = 168, Q3 = 173, Q4 = 154, Q5 = 124; current—Q1 = 109, Q2 = 180, Q3 = 215, Q4 = 267, Q5 = 296. Adjusted for sex, age, age<sup>2</sup>, center, estimated glomerular filtration rate, body mass index, education duration, history of diabetes, triglyceride level, total cholesterol level, high-density lipoprotein cholesterol level, alcohol consumption, and physical activity.

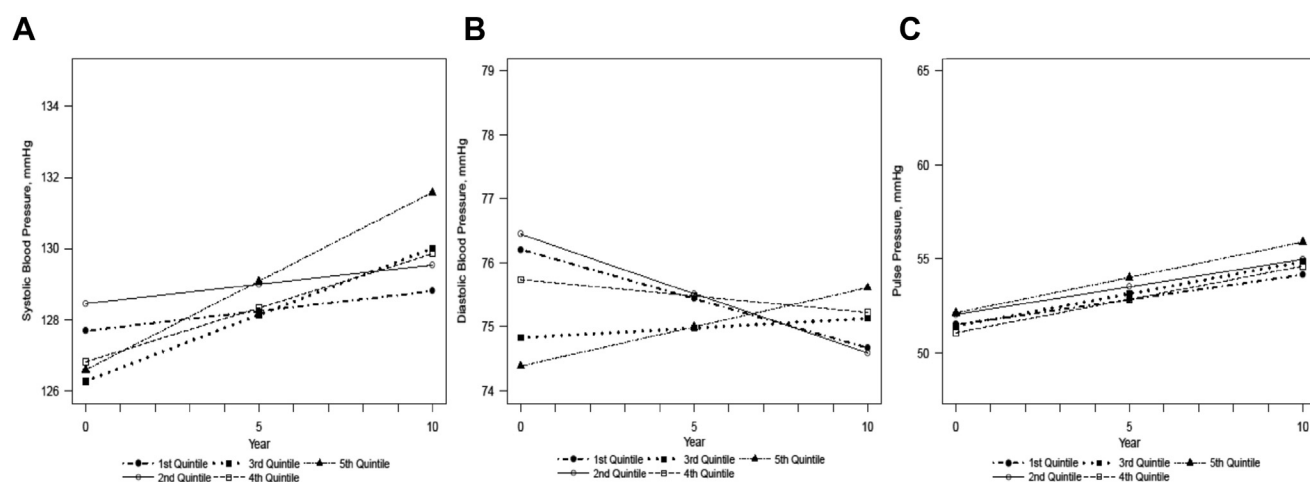

**eFigure 4.** Estimated (A) systolic blood pressure, (B) diastolic blood pressure, (C) pulse pressure, not adjusted for antihypertensive medication, in upper and lower quintiles of creatinine-adjusted urinary cadmium by smoking status, fully adjusted,  $n = 2853$ . (A)  $P$  for interaction (across all quintiles): .077; (B)  $P$  for interaction: .002; (C)  $P$  for interaction: .915. N: Q1 = 563, Q2 = 581, Q3 = 579, Q4 = 578, Q5 = 552. Adjusted for sex, age, age<sup>2</sup>, center, estimated glomerular filtration rate, body mass index, smoking status, education duration, history of diabetes, triglyceride level, total cholesterol level, high-density lipoprotein cholesterol level, alcohol consumption and physical activity.



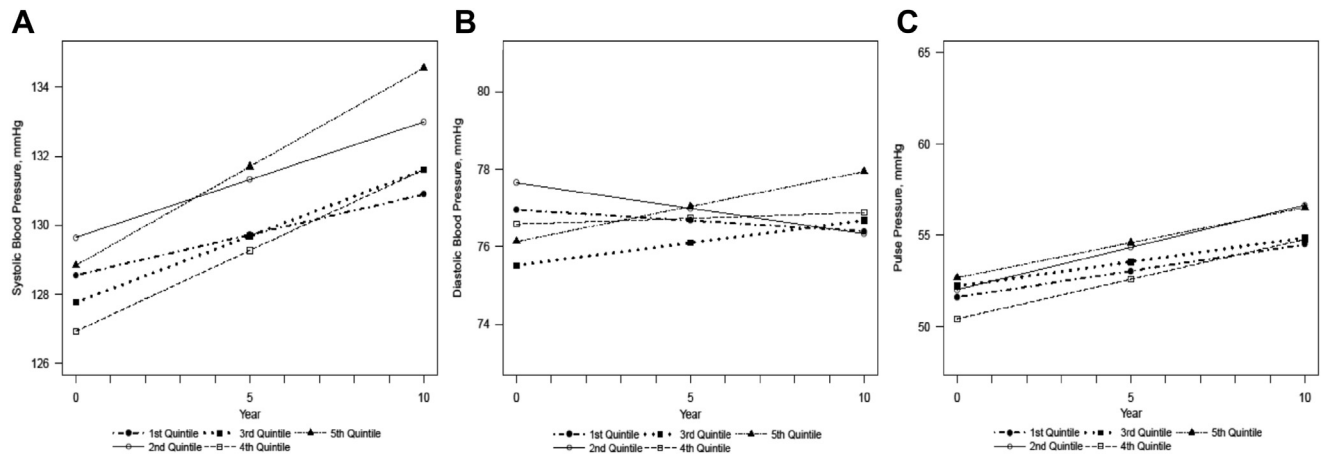

**eFigure 5.** Estimated (A) systolic blood pressure, (B) diastolic blood pressure, (C) pulse pressure in upper and lower quintiles of creatinine-adjusted urinary cadmium by smoking status, excluding individuals with a history of heart conditions, fully adjusted,  $n = 2784$ . (A)  $P$  for interaction (across all quintiles): .422; (B)  $P$  for interaction: .017; (C)  $P$  for interaction: .573. N: Q1 = 424, Q2 = 431, Q3 = 242, Q4 = 440, Q5 = 426. Adjusted for sex, age, age<sup>2</sup>, center, estimated glomerular filtration rate, body mass index, smoking status, education duration, history of diabetes, triglyceride level, total cholesterol level, high-density lipoprotein cholesterol level, alcohol consumption, and physical activity.

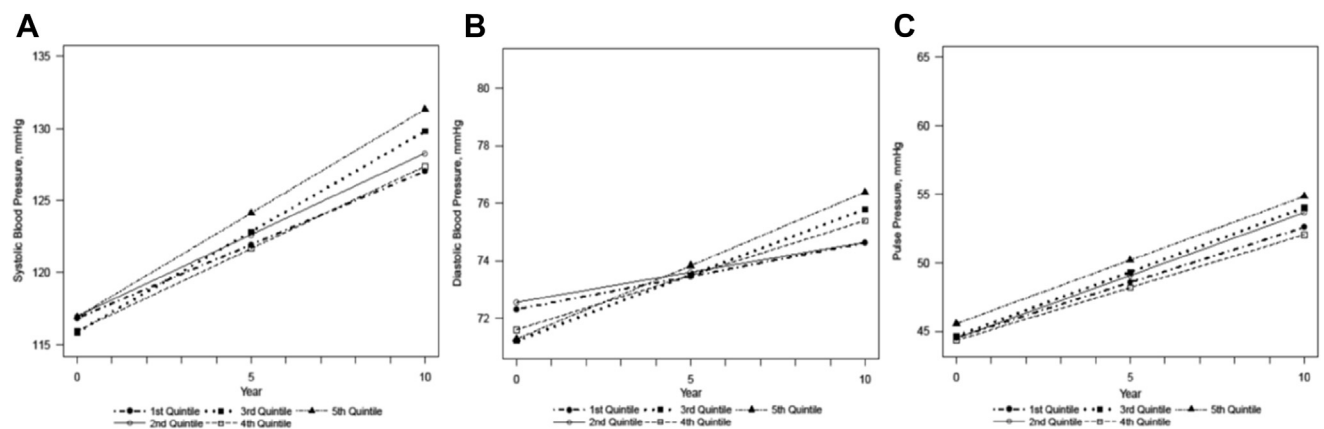

**eFigure 6.** Estimated (A) systolic blood pressure, (B) diastolic blood pressure, (C) pulse pressure in upper and lower quintiles of creatinine-adjusted urinary cadmium by smoking status, excluding individuals with baseline hypertension, fully adjusted,  $n = 1790$ . (A)  $P$  for interaction (across all quintiles): .138; (B)  $P$  for interaction: .015; (C)  $P$  for interaction: .730. N: Q1 = 314, Q2 = 347, Q3 = 380, Q4 = 366, Q5 = 383. Adjusted for sex, age, age<sup>2</sup>, center, estimated glomerular filtration rate, body mass index, smoking status, education duration, history of diabetes, triglyceride level, total cholesterol level, high-density lipoprotein cholesterol level, alcohol consumption, and physical activity.



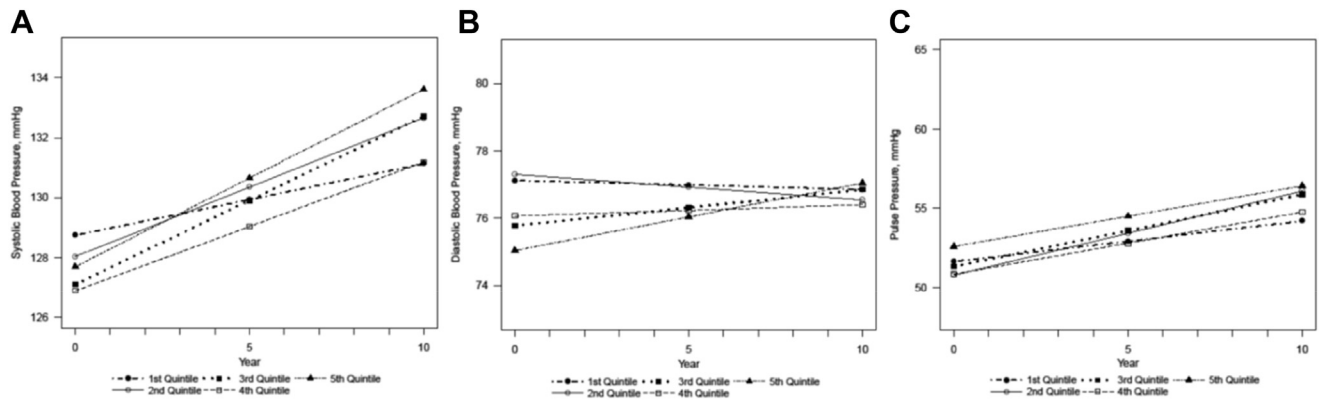

**eFigure 7.** Estimated (A) systolic blood pressure, (B) diastolic blood pressure, (C) pulse pressure in upper and lower quintiles of creatinine-adjusted urinary cadmium by smoking status, adjusted for packs per year, fully adjusted,  $n = 1905$  (A)  $P$  for interaction (across all quintiles): .511; (B)  $P$  for interaction: .105; (C)  $P$  for interaction: .594 N: Q1 = 318, Q2 = 389, Q3 = 385, Q4 = 401, Q5 = 412. Adjusted for sex, age, age<sup>2</sup>, center, estimated glomerular filtration rate, body mass index, smoking status, education duration, history of diabetes, triglyceride level, total cholesterol level, high-density lipoprotein cholesterol level, alcohol consumption, physical activity, and packs per year.
